# Supplementary material
Source: publisher site journal article supplement (https://www.dovepress.com/article/371371)

**Online supplement**

**Table S1:** Predictive performance of various FEV1/ FEV6 cut-off points against RADICALS trial diagnostic criteria (Post-BD FEV1/FVC <0.7 and clinical correlation).

| **FEV1/ FEV6** **cut-off** | **Sensitivity (%)** | **Specificity (%)** | **AUROC** | **PPV (%)** | **NPV (%)** |
| --- | --- | --- | --- | --- | --- |
| <0.66 | 50.8 | 85.1 | 0.679 | 90.6 | 37.8 |
| <0.67 | 53.2 | 85.1 | 0.691 | 91.0 | 38.9 |
| <0.68 | 57.3 | 83.9 | 0.706 | 91.0 | 40.8 |
| <0.69 | 61.7 | 80.5 | 0.711 | 90.0 | 42.4 |
| <0.70 | 65.7 | 79.3 | 0.725 | 90.1 | 44.8 |
| <0.71 | 70.6 | 73.6 | 0.721 | 88.4 | 46.7 |
| <0.72 | 75.8 | 65.5 | 0.707 | 86.2 | 48.7 |
| <0.73 | 83.9 | 59.8 | 0.718 | 85.6 | 56.5 |
| <0.74 | 89.9 | 46.0 | 0.679 | 82.6 | 61.5 |
| <0.75 | 93.1 | 35.6 | 0.644 | 80.5 | 64.6 |

Positive Predictive Value (PPV), Negative Predictive Value (NPV), Area Under the Receiver Operating Characteristic Curve (AUROC).

**Table S2:** The predictive performance of various FEV1/ FEV6 cut-off points against FEV1/FVC <0.7.

| **FEV1/ FEV6** **cut-off** | **Sensitivity (%)** | **Specificity (%)** | **AUROC** | **PPV (%)** | **NPV (%)** |
| --- | --- | --- | --- | --- | --- |
| <0.66 | 56.5 | 88.9 | 0.727 | 91.3 | 49.7 |
| <0.67 | 59.2 | 88.9 | 0.740 | 91.7 | 51.3 |
| <0.68 | 63.7 | 88.0 | 0.758 | 91.6 | 54.0 |
| <0.69 | 68.2 | 84.3 | 0.762 | 89.9 | 56.2 |
| <0.70 | 72.6 | 83.3 | 0.780 | 90.0 | 59.6 |
| <0.71 | 77.1 | 76.9 | 0.770 | 87.3 | 61.9 |
| <0.72 | 82.1 | 70.4 | 0.762 | 85.1 | 65.5 |
| <0.73 | 87.9 | 59.3 | 0.736 | 81.7 | 70.3 |
| <0.74 | 91.5 | 42.6 | 0.670 | 76.7 | 70.8 |
| <0.75 | 94.2 | 32.4 | 0.633 | 74.2 | 72.9 |

Positive Predictive Value (PPV), Negative Predictive Value (NPV), Area Under the Receiver Operating Characteristic Curve (AUROC).

**Table S3:** Predictive performance of various FEV1/ FEV6 cut-off points against FEV1/FVC<LLN.

| **FEV1/ FEV6** **cut-off** | **Sensitivity (%)** | **Specificity (%)** | **AUROC** | **PPV (%)** | **NPV (%)** |
| --- | --- | --- | --- | --- | --- |
| <0.66 | 68.0 | 90.2 | 0.791 | 87.4 | 73.8 |
| <0.67 | 71.2 | 89.5 | 0.804 | 87.2 | 75.7 |
| <0.68 | 76.5 | 87.6 | 0.820 | 86.0 | 78.8 |
| <0.69 | 79.7 | 82.4 | 0.810 | 81.9 | 80.3 |
| <0.70 | 84.3 | 80.4 | 0.824 | 81.1 | 83.7 |
| <0.71 | 87.6 | 73.2 | 0.804 | 76.6 | 85.5 |
| <0.72 | 89.5 | 64.1 | 0.768 | 71.4 | 86.0 |
| <0.73 | 96.1 | 54.2 | 0.752 | 67.7 | 93.3 |
| <0.74 | 97.4 | 38.6 | 0.680 | 61.3 | 93.7 |
| <0.75 | 98.0 | 28.8 | 0.634 | 57.9 | 93.6 |

Positive Predictive Value (PPV), Negative Predictive Value (NPV), Area Under the Receiver Operating Characteristic Curve (AUROC).

**Table S4:** Predictive performance of various FEV1/ FEV6 cut-off points against mild and moderate-severe COPD

| **FEV1/ FEV6** **cut-off** | **Mild COPD** | | | **Moderate – Severe COPD** | | |
| --- | --- | --- | --- | --- | --- | --- |
| **Sensitivity (%)** | **Specificity (%)** | **AUROC** | **Sensitivity (%)** | **Specificity (%)** | **AUROC** |
| <0.66 | 37.8 | 54.2 | 0.460 | 85.3 | 69.7 | 0.775 |
| <0.67 | 40.6 | 53.5 | 0.471 | 86.8 | 67.8 | 0.773 |
| <0.68 | 44.4 | 51.0 | 0.477 | 91.2 | 64.8 | 0.780 |
| <0.69 | 49.4 | 47.7 | 0.486 | 94.1 | 60.3 | 0.772 |
| <0.70 | 55.0 | 47.1 | 0.510 | 94.1 | 56.2 | 0.751 |
| <0.71 | 61.7 | 43.9 | 0.528 | 94.1 | 49.8 | 0.720 |
| <0.72 | 68.9 | 39.4 | 0.541 | 94.1 | 42.3 | 0.682 |
| <0.73 | 78.9 | 34.8 | 0.569 | 97.1 | 33.7 | 0.654 |
| <0.74 | 86.7 | 26.5 | 0.566 | 98.5 | 24.0 | 0.612 |
| <0.75 | 90.6 | 20.0 | 0.553 | 100 | 18.0 | 0.590 |

Positive Predictive Value (PPV), Negative Predictive Value (NPV), Area Under the Receiver Operating Characteristic Curve (AUROC).

**Figure S1:** ROC curves for SGRQ, CAT and mMRC against post-BD FEV1/FVC <0.7 and clinical correlation.

1. SGRQ (AUROC=0.651, 95%CI 0.586–0.716, p-value=0.0001).


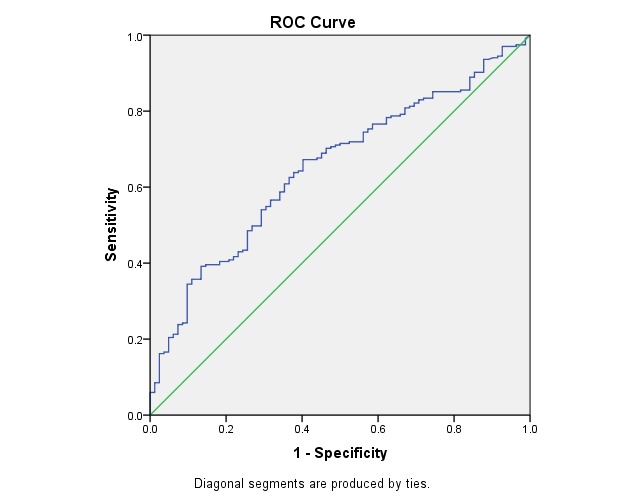


1. CAT (AUROC=0.620, 95%CI 0.536–0.703, p-value=0.009).


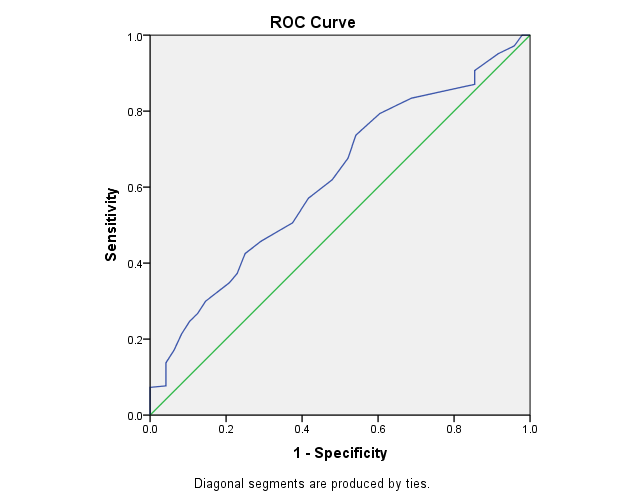


1. mMRC (AUROC=0.612, 95%CI 0.528–0.696, p-value=0.014).


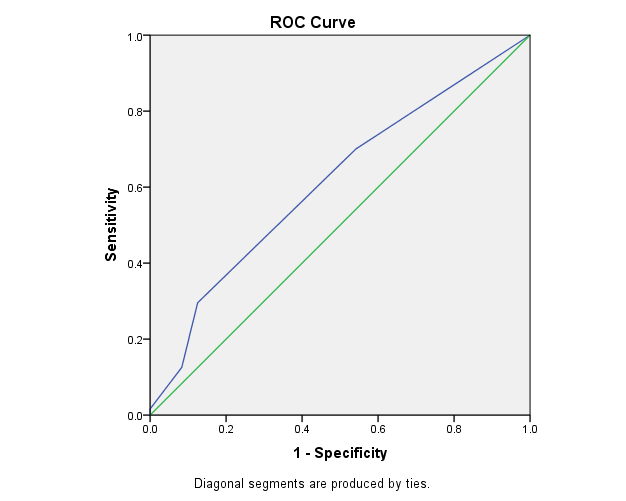


**Figure S2:** ROC curves for SGRQ, CAT and mMRC against post-BD FEV1/FVC <0.7.

1. SGRQ (AUROC=0.641, 95%CI 0.579–0.704, p-value <0.001).


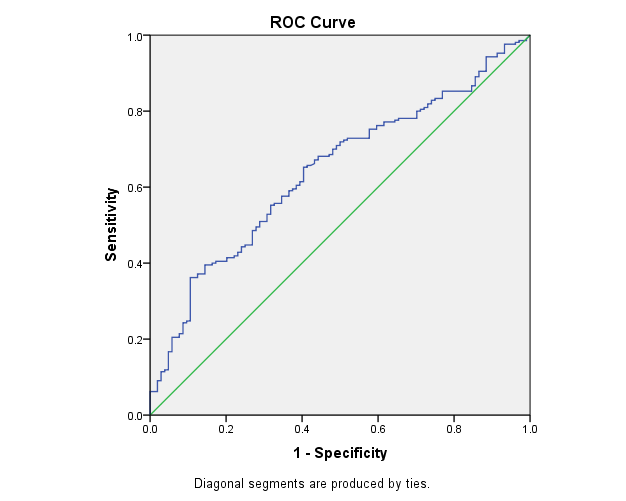


1. CAT score (ROC=0.605, 95%CI 0.532–0.678, p-value=0.007).


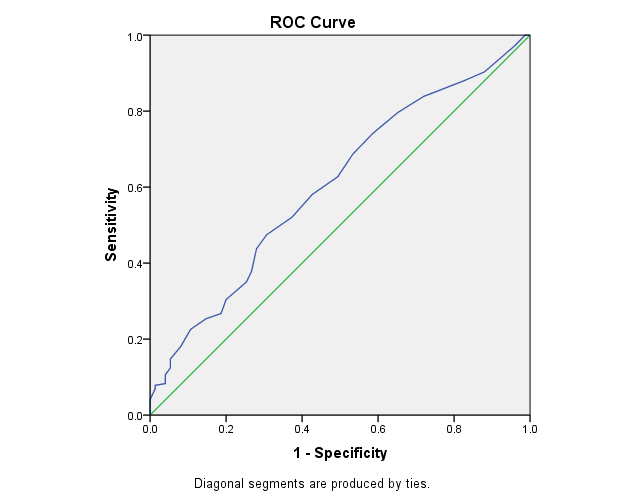


1. mMRC (AUROC=0.608, 95%CI 0.537–0.680, p-value=0.005).


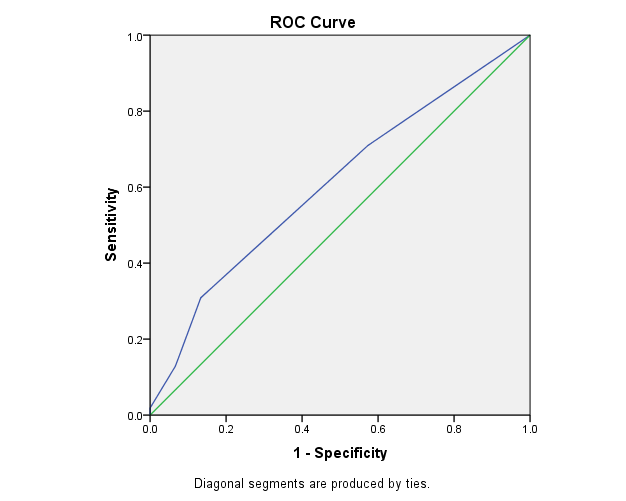


**Figure S3**: ROC curves for SGRQ, CAT and mMRC against post-BD FEV1/FVC <LLN.

1. SGRQ (AUROC=0.679, 95%CI0.617–0.740, p-value <0.0001).


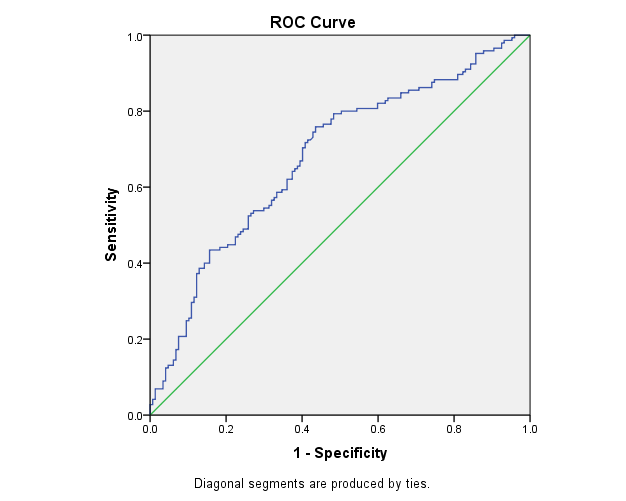


1. CAT (AUROC=0.633, 95%CI 0.566–0.700, p-value <0.0001).


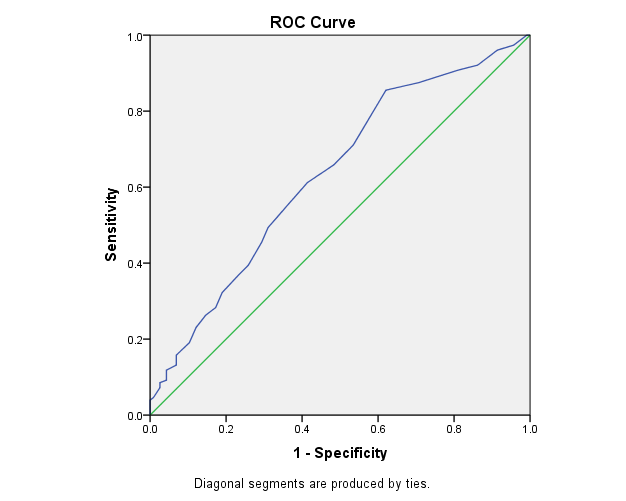


1. mMRC (AUROC=0.616, 95%CI 0.548–0.683, p-value 0.001).


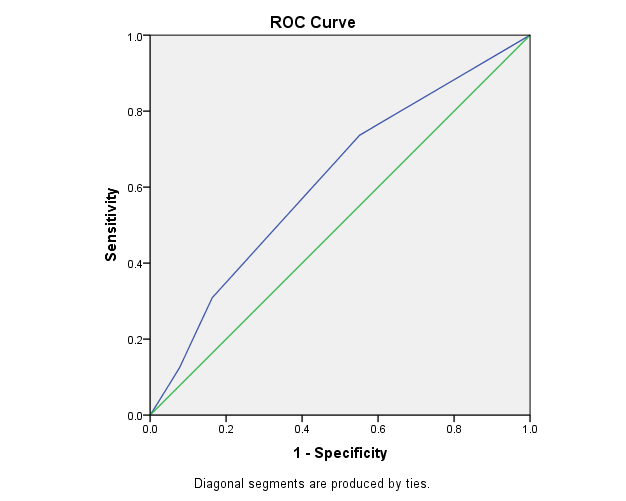

Supplement: Supplementary file 1 [file get_supplementary_file.php]
